# Supplementary material for: Trajectory of beta cell function and insulin clearance in stage 2 type 1 diabetes: natural history and response to teplizumab
Source: Springer Nature journal article supplement (doi:10.1007/s00125-024-06323-0), 2024-11-19
Supplement: 125_2024_6323_MOESM1_ESM.pdf [file 125_2024_6323_MOESM1_ESM.pdf]

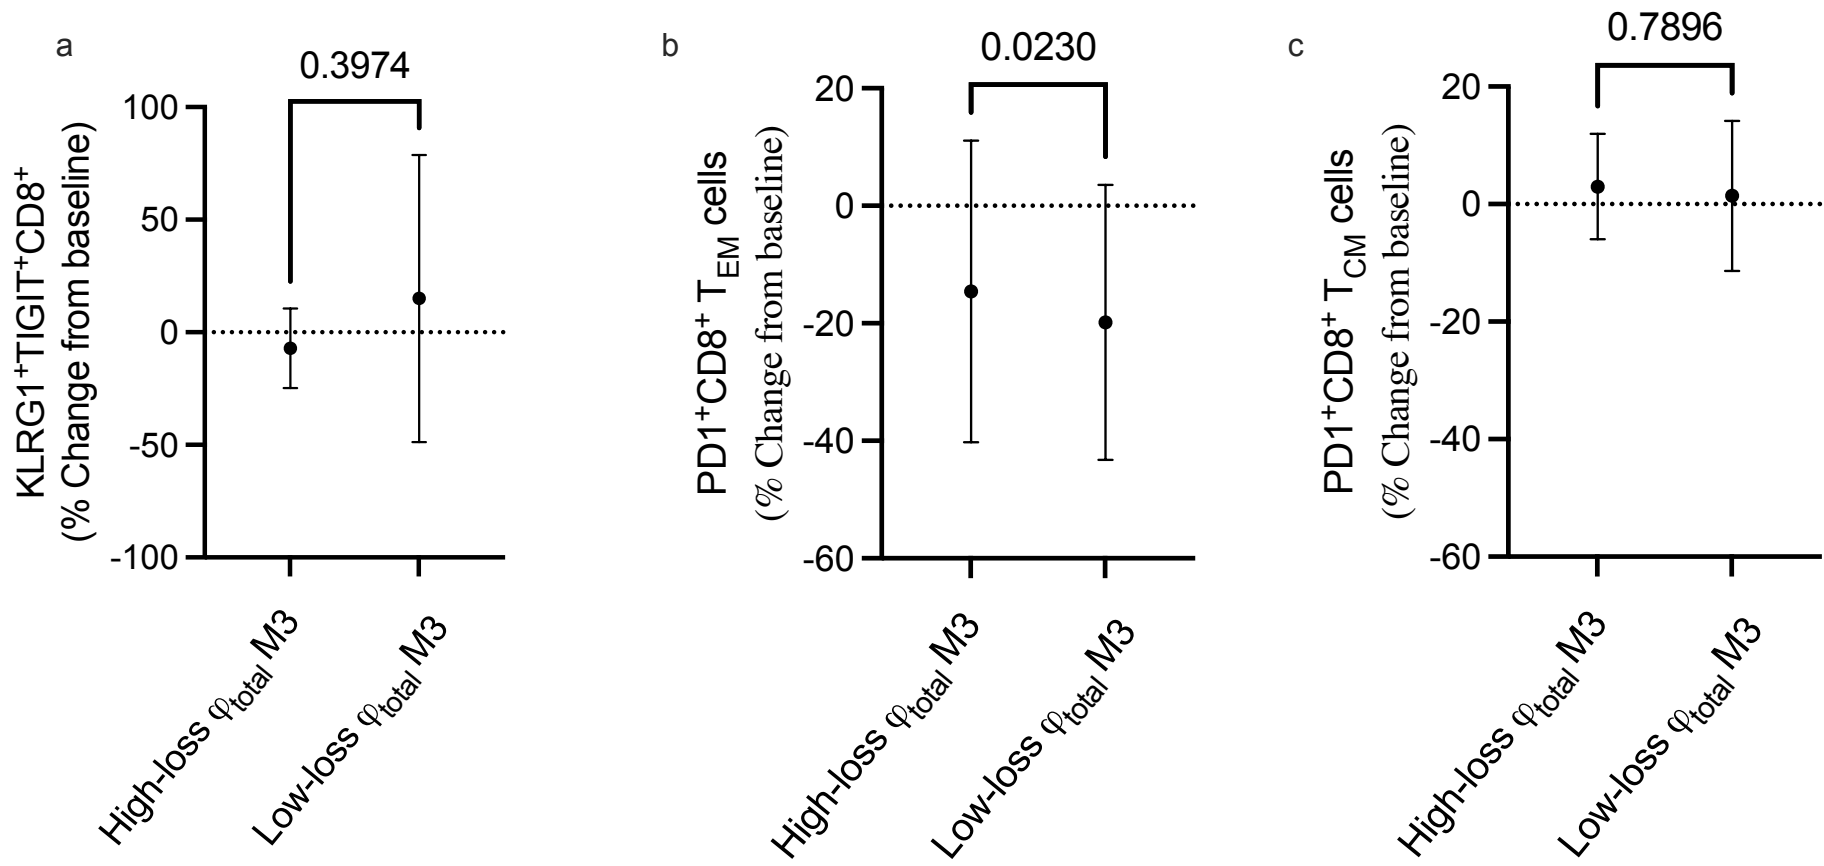

**ESM Fig. 1** High-loss vs low-loss insulin secretion ( $\varphi_{total}$ ) in the entire cohort. Percent change from baseline in **(a)** partially exhausted C8<sup>+</sup>T cells (KLRG1<sup>+</sup>TIGIT<sup>+</sup>), **(b)** CD8<sup>+</sup> T effector memory cells ( $T_{EM}$ , CD3<sup>+</sup>CD56<sup>-</sup>CD8<sup>+</sup>CD45R0<sup>+</sup>CCR7<sup>-</sup>PD1<sup>+</sup>) and **(c)** T central memory cells ( $T_{CM}$ , CD3<sup>+</sup>CD56<sup>-</sup>CD8<sup>+</sup>CD45R0<sup>+</sup>CCR7<sup>+</sup>PD1<sup>+</sup>). Data are expressed as median (25<sup>th</sup>, 75<sup>th</sup> centile).
